# Supplementary material for: Promotion mechanism of CeO2addition on the low temperature SCR reaction over MnOx/TiO2: a new insight from the kinetic study
Source: Royal Society of Chemistry journal article supplement (doi:10.1039/c5ra01767j), 2015-01-01
Supplement: c5ra01767j1.pdf [file c5ra01767j1.pdf]

# Supporting Materials

## **Promotion mechanism of CeO<sub>2</sub> addition on the low temperature SCR reaction over MnO<sub>x</sub>/TiO<sub>2</sub>: A new insight from the kinetic study**

Shangchao Xiong, Yong Liao, Hao Dang, Feihong Qi, Shijian Yang \*

*School of Environmental and Biological Engineering, Nanjing University of Science and  
Technology, Nanjing, 210094 P. R. China*

---

\* Corresponding author phone: 86-18-066068302; E-mail: [yangshijiangsq@163.com](mailto:yangshijiangsq@163.com) (S. J. Yang).

## 1. Catalytic test

The ratios of NO<sub>x</sub> and NH<sub>3</sub> conversion, the amount of N<sub>2</sub> formed, and N<sub>2</sub>O selectivity were calculated using the following equations:

$$\text{NO}_x \text{ conversion} = \frac{[\text{NO}_x]_{\text{in}} - [\text{NO}_x]_{\text{out}}}{[\text{NO}_x]_{\text{in}}} \quad (\text{S1})$$

$$\text{NH}_3 \text{ conversion} = \frac{[\text{NH}_3]_{\text{in}} - [\text{NH}_3]_{\text{out}}}{[\text{NH}_3]_{\text{in}}} \quad (\text{S2})$$

$$\text{N}_2 \text{ formed} = [\text{NO}_x]_{\text{in}} + [\text{NH}_3]_{\text{in}} - [\text{NO}_x]_{\text{out}} - [\text{NH}_3]_{\text{out}} - 2[\text{N}_2\text{O}]_{\text{out}} \quad (\text{S3})$$

$$\text{N}_2\text{O selectivity} = \frac{2[\text{N}_2\text{O}]_{\text{out}}}{[\text{NH}_3]_{\text{in}} + [\text{NO}_x]_{\text{in}} - [\text{NH}_3]_{\text{out}} - [\text{NO}_x]_{\text{out}}} \quad (\text{S4})$$

Where, [NH<sub>3</sub>]<sub>in</sub>, [NO<sub>x</sub>]<sub>in</sub>, [NH<sub>3</sub>]<sub>out</sub>, [NO<sub>x</sub>]<sub>out</sub> and [N<sub>2</sub>O]<sub>out</sub> were the concentrations of NH<sub>3</sub> and NO<sub>x</sub> (including NO and NO<sub>2</sub>) in the inlet, and the concentrations of NH<sub>3</sub>, NO<sub>x</sub> and N<sub>2</sub>O in the outlet, respectively.

## 2. XPS

XPS spectra of MnO<sub>x</sub>/TiO<sub>2</sub> and MnO<sub>x</sub>-CeO<sub>2</sub>/TiO<sub>2</sub> over the spectral regions of Mn 2p, O 1s, Ti 2p and Ce 3d were shown in Fig. S1. The Mn peaks on MnO<sub>x</sub>/TiO<sub>2</sub> mainly centered at 642.4, 641.3 and 640.3 eV (shown in Fig. S1a), which were assigned to Mn<sup>4+</sup>, Mn<sup>3+</sup> and Mn<sup>2+</sup>, respectively.<sup>1</sup> The O peak mainly centered at about 529.7 and 531.0 eV (shown in Fig. S1b), which were assigned to O in transition metal oxides and -OH.<sup>2</sup> The Ti peaks mainly centered at 464.3 and 458.6 eV (shown in Fig. S1c), which were assigned to Ti 2p 1/2 and Ti 2p 3/2 of Ti<sup>4+</sup>.<sup>3</sup>

After CeO<sub>2</sub> addition, no obvious changes happened in the Mn, O and Ti spectra regions of MnO<sub>x</sub>/TiO<sub>2</sub> (shown in Figs. S1d, e and f). The Ce 3d binding energies of MnO<sub>x</sub>-CeO<sub>2</sub>/TiO<sub>2</sub> mainly centered at 906.0, 903.3, 900.9, 898.6, 887.1, 885.2 and 881.9 eV (shown in Fig. S1g). The bands at 906.0, 900.9, 898.6, 887.1 and 881.9 eV were attributed to Ce<sup>4+</sup>, and the bands at 903.3 and 885.2 eV were assigned to Ce<sup>3+</sup>.<sup>4, 5</sup>

## 3. NH<sub>3</sub> oxidation and NO oxidation

Fig. S3 shows the effect of CeO<sub>2</sub> addition on NO and NH<sub>3</sub> oxidation over MnO<sub>x</sub>/TiO<sub>2</sub>. As shown in Fig. S3a, NO oxidation over MnO<sub>x</sub>/TiO<sub>2</sub> did not vary after CeO<sub>2</sub> addition. However, NH<sub>3</sub> oxidation over MnO<sub>x</sub>/TiO<sub>2</sub> was obviously promoted after CeO<sub>2</sub> addition (shown in Fig. S2b).

Meanwhile, N<sub>2</sub>O selectivity of NH<sub>3</sub> oxidation over MnO<sub>x</sub>/TiO<sub>2</sub> was slightly higher than that over MnO<sub>x</sub>-CeO<sub>2</sub>/TiO<sub>2</sub>.

## References:

1. S. Yang, N. Yan, Y. Guo, D. Wu, H. He, Z. Qu, J. Li, Q. Zhou and J. Jia, *Environ. Sci. Technol.*, 2011, **45**, 1540-1546.
2. S. Yang, F. Qi, Y. Liao, S. Xiong, Y. Lan, Y. Fu, W. Shan and J. Li, *Ind. Eng. Chem. Res.*, 2014, **53**, 5810-5819.
3. S. Yang, Y. Guo, N. Yan, D. Wu, H. He, Z. Qu, C. Yang, Q. Zhou and J. Jia, *ACS Appl. Mater. Interface.*, 2011, **3**, 209-217.
4. L. Chen, J. H. Li and M. F. Ge, *J. Phys. Chem. C*, 2009, **113**, 21177-21184.
5. S. J. Yang, Y. F. Guo, H. Z. Chang, L. Ma, Y. Peng, Z. Qu, N. Q. Yan, C. Z. Wang and J. H. Li, *Appl. Catal. B-environ*, 2013, **136**, 19-28.

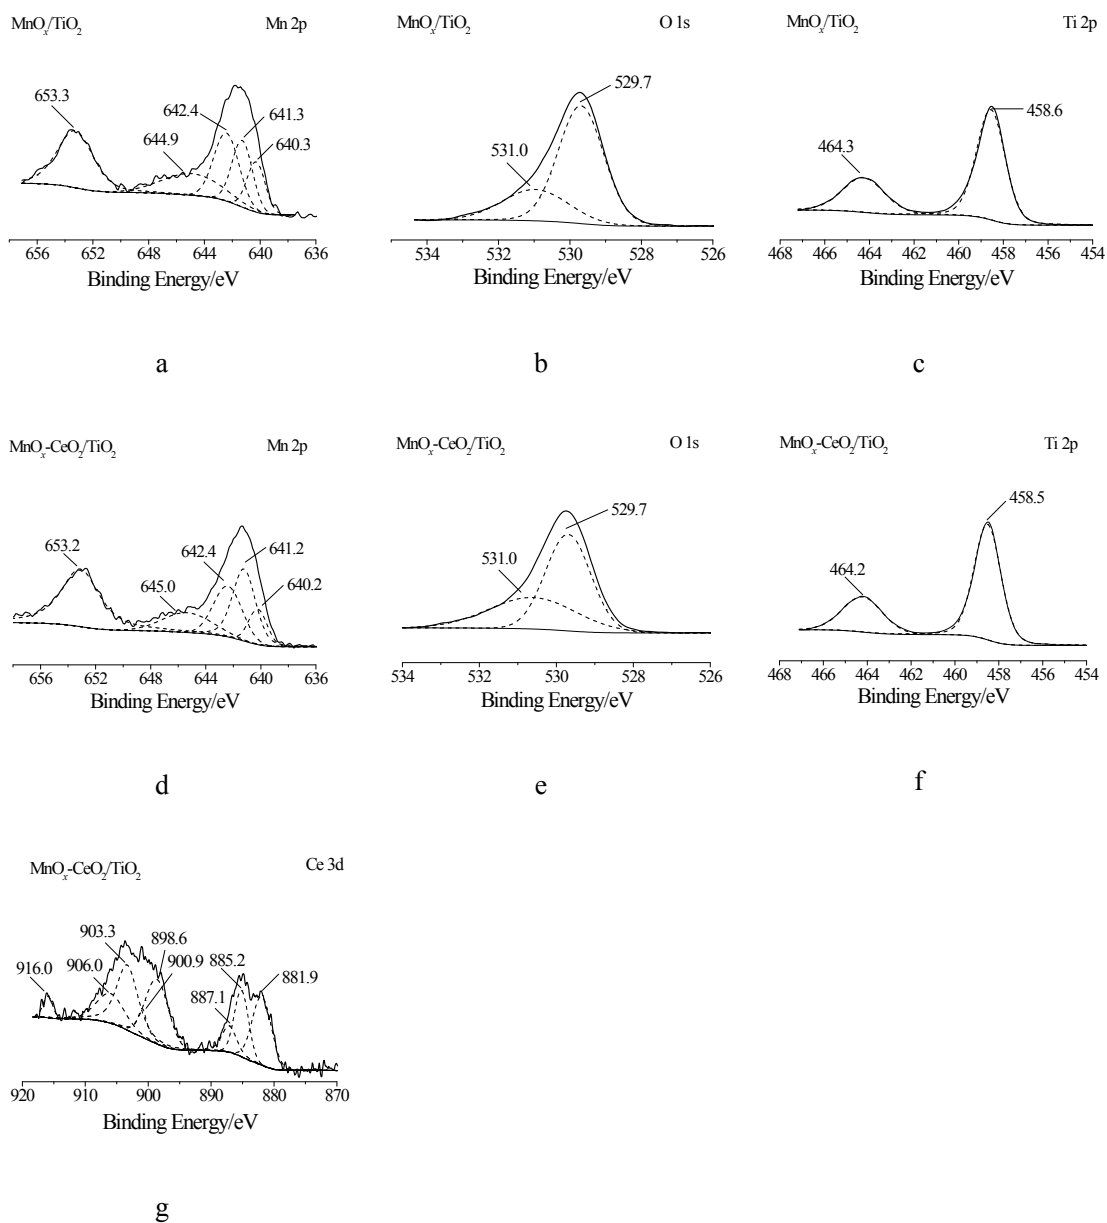

Fig. S1 XPS spectra of  $\text{MnO}_x/\text{TiO}_2$  and  $\text{MnO}_x\text{-CeO}_2/\text{TiO}_2$  over the spectral regions of Mn 2p, O 1s, Ce 3d and Ti 2p

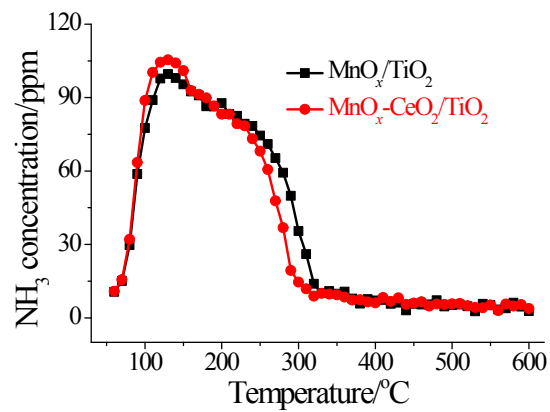

a

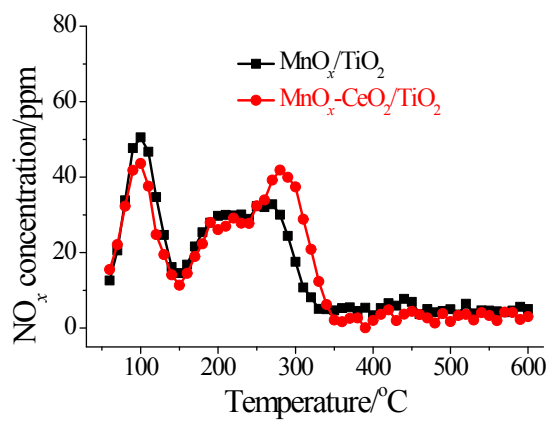

b

Fig. S2 The profiles of (a) NH<sub>3</sub>-TPD and (b) NO-TPD of MnO<sub>x</sub>/TiO<sub>2</sub> and MnO<sub>x</sub>-CeO<sub>2</sub>/TiO<sub>2</sub>

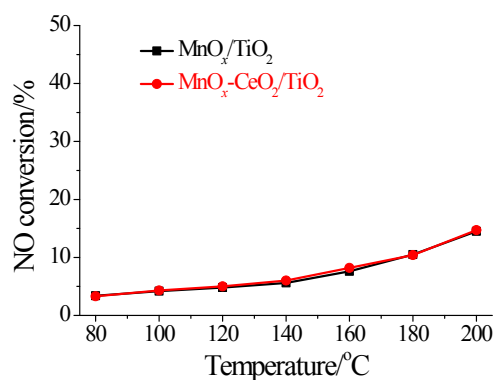

a

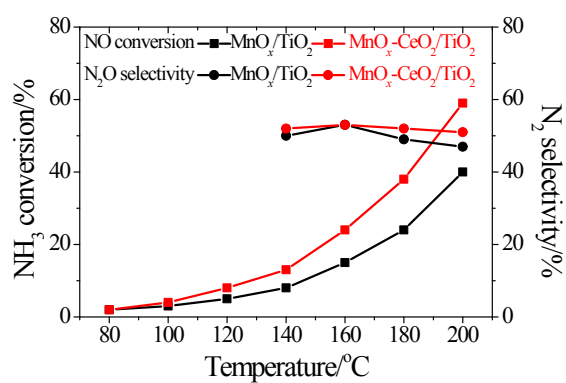

b

Fig. S3 Effect on CeO<sub>2</sub> addition on NO (a) and NH<sub>3</sub> oxidation (b) over MnO<sub>x</sub>/TiO<sub>2</sub>. Reaction conditions: [NH<sub>3</sub>]/[NO]=500 ppm, [O<sub>2</sub>]=2%, catalyst mass=250 mg, total flow rate=200 mL min<sup>-1</sup> and GHSV=4.8×10<sup>4</sup> cm<sup>3</sup> g<sup>-1</sup> h<sup>-1</sup>.
